# Supplementary material for: Photovoltaic studies on perylene diimide-based copolymers containing electronic push–pull chromophores
Source: Royal Society of Chemistry journal article supplement (doi:10.1039/c3ra23383a), 2013-01-01
Supplement: c3ra23383a.pdf [file c3ra23383a.pdf]

## SUPPORTING INFORMATION

### Photovoltaic Studies on Perylene Diimide-based Copolymers Containing Electronic Push-Pull Chromophores

Michael Ruby Raj, Sekar Ramkumar, Sambandam Anandan\*

Nanomaterials & Solar Energy Conversion Lab, Department of Chemistry,  
National Institute of Technology, Tiruchirappalli-620 015, India.

\*Corresponding authors (sanand@nitt.edu ; sanand99@yahoo.com)

| Contents                                                                                                                                                   | Page |
|------------------------------------------------------------------------------------------------------------------------------------------------------------|------|
| <b>Figure S1.</b> Gel permeation chromatogram of 1,7-DPPDI-PFDA copolymer in THF relative to low molecular weight polystyrene standard.                    | 2    |
| <b>Figure S2.</b> Gel permeation chromatogram of 1,7-DBPDI-PFDA copolymer in THF relative to low molecular weight polystyrene standard.                    | 3    |
| <b>Figure S3.</b> <sup>1</sup> H-NMR spectrum of compound <b>3</b> in CDCl <sub>3</sub> and TMS as internal standard.                                      | 4    |
| <b>Figure S4.</b> <sup>1</sup> H-NMR spectrum of compound <b>4</b> in CDCl <sub>3</sub> and TMS as internal standard.                                      | 5    |
| <b>Figure S5.</b> <sup>1</sup> H-NMR spectrum of compound <b>5</b> in CDCl <sub>3</sub> and TMS as internal standard.                                      | 6    |
| <b>Figure S6.</b> <sup>1</sup> H-NMR spectrum of compound <b>6</b> in CDCl <sub>3</sub> and TMS as internal standard.                                      | 7    |
| <b>Figure S7.</b> Thermogravimetric (black) and its corresponding derivative weight curves (blue) for (a) 1,7-DPPDI-PFDA and (b) 1,7-DBPDI-PFDA copolymer. | 8    |
| <b>Data.</b> XYZ coordinates of 1,7-DPPDI-PFDA copolymer optimized at RB3LYP/6-31G(d) basis set.                                                           | 9    |
| <b>Data.</b> XYZ coordinates of 1,7-DBPDI-PFDA copolymer optimized at RB3LYP/6-31G(d) basis set.                                                           | 12   |

Sample code: **1,7-DPPDI-PFDA copolymer**

|                   |                            |
|-------------------|----------------------------|
| Sample Name:      | S 18                       |
| Sample Type:      | Broad Unknown              |
| Vial:             | 18                         |
| Injection #:      | 1                          |
| Injection Volume: | 80.00 ul                   |
| Run Time:         | 34.0 Minutes               |
| Date Acquired:    | 10/23/2012 9:37:01 PM IST  |
| Date Processed:   | 10/29/2012 12:10:05 PM IST |

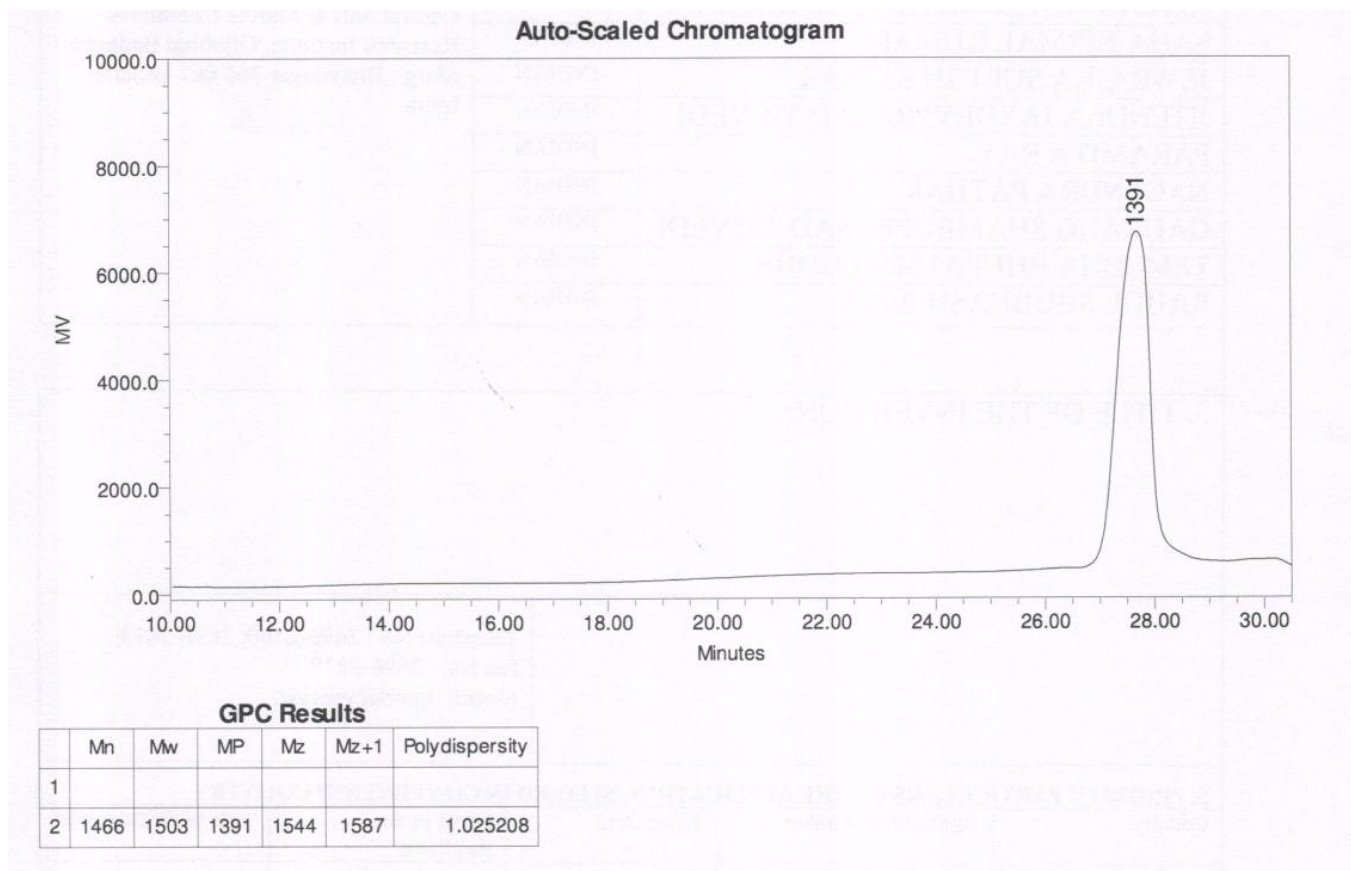

**Figure S1.** Gel permeation chromatogram of 1,7-DPPDI-PFDA copolymer in THF relative to low molecular weight polystyrene standard.

Sample code: **1,7-DBPDI-PFDA copolymer**

Sample Name: S 20  
Sample Type: Broad Unknown  
Vial: 20  
Injection #: 1  
Injection Volume: 80.00 ul  
Run Time: 34.0 Minutes  
  
Date Acquired: 10/23/2012 10:47:36 PM IST  
Date Processed: 10/29/2012 12:10:05 PM IST

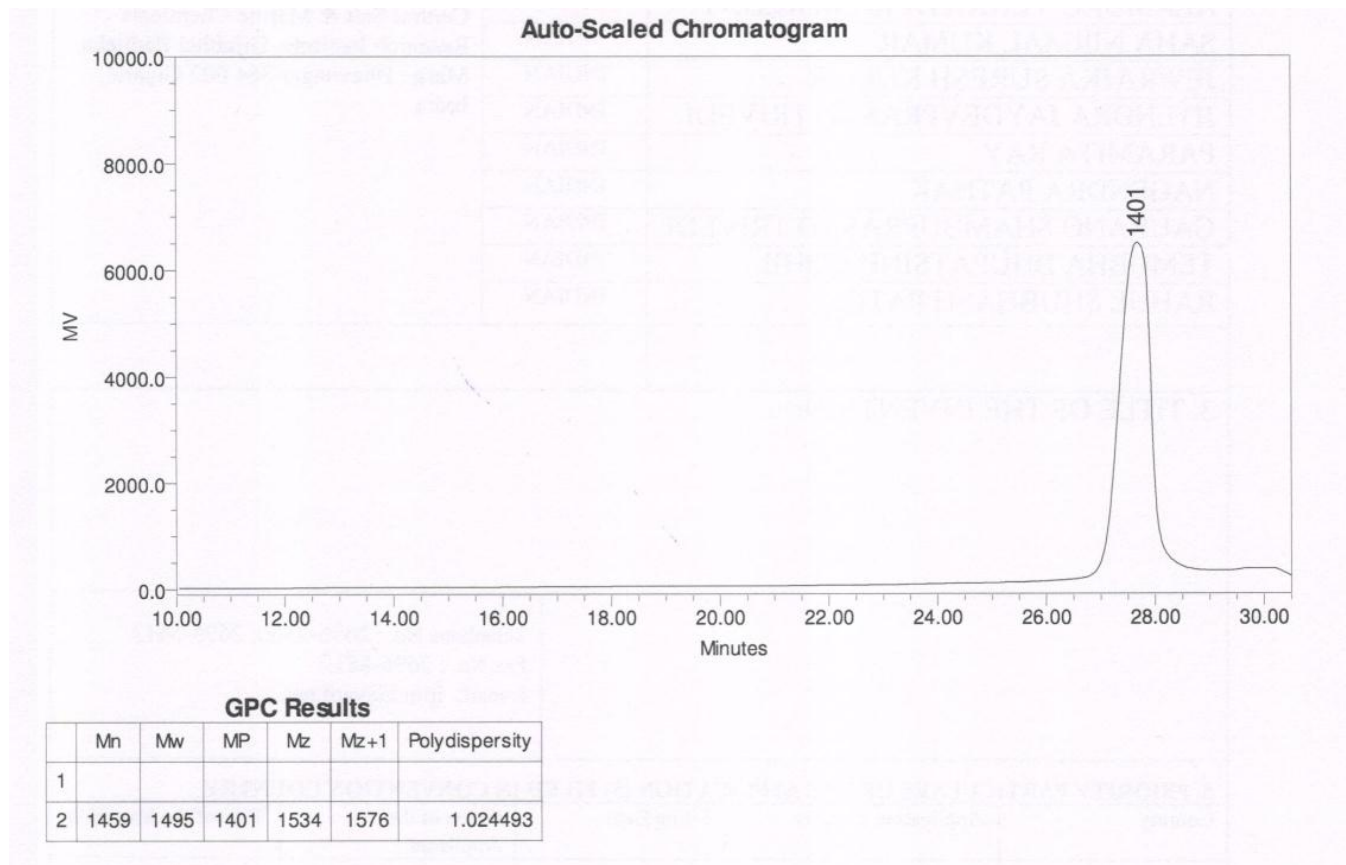

**Figure S2.** Gel permeation chromatogram of 1,7-DBPDI-PFDA copolymer in THF relative to low molecular weight polystyrene standard.

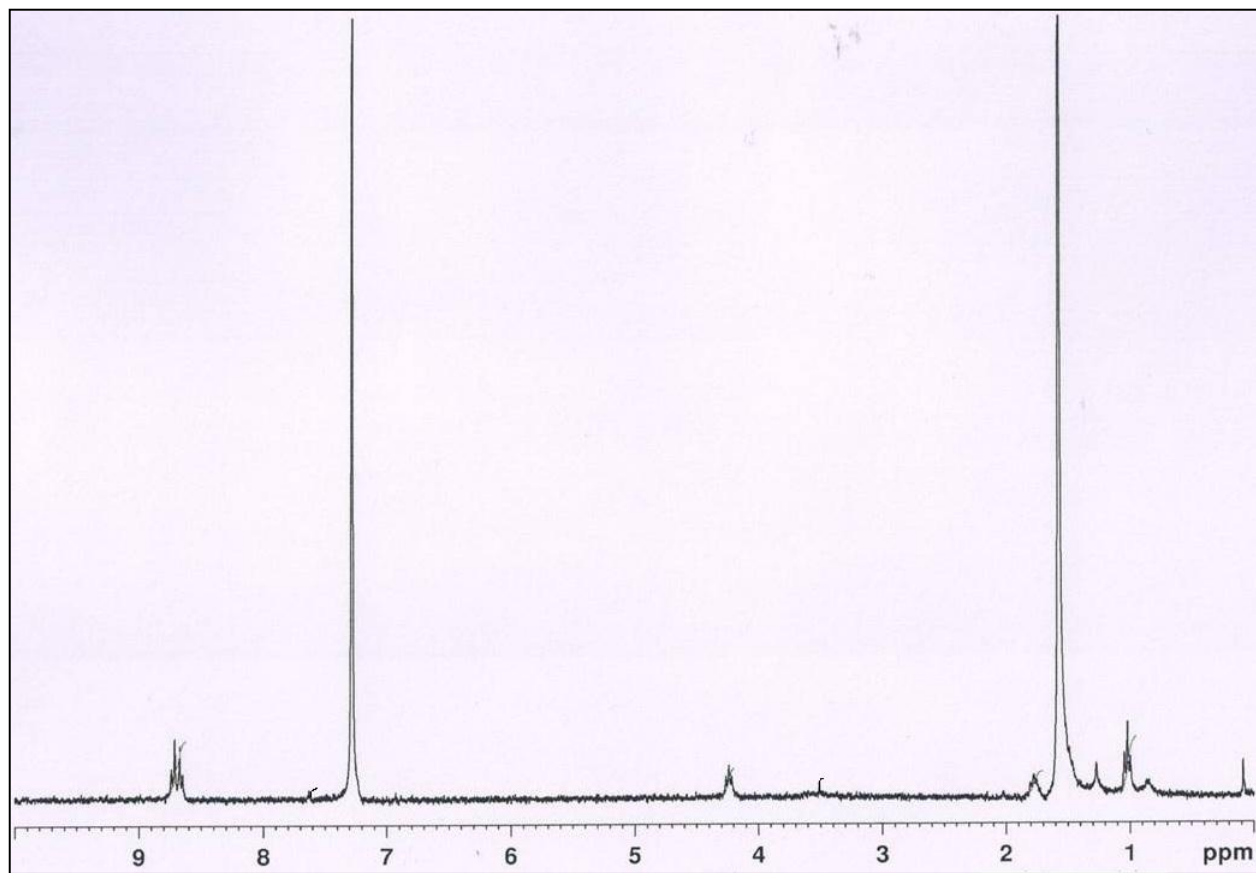

**Figure S3.** <sup>1</sup>H-NMR spectrum of compound **3** in CDCl<sub>3</sub> and TMS as internal standard.

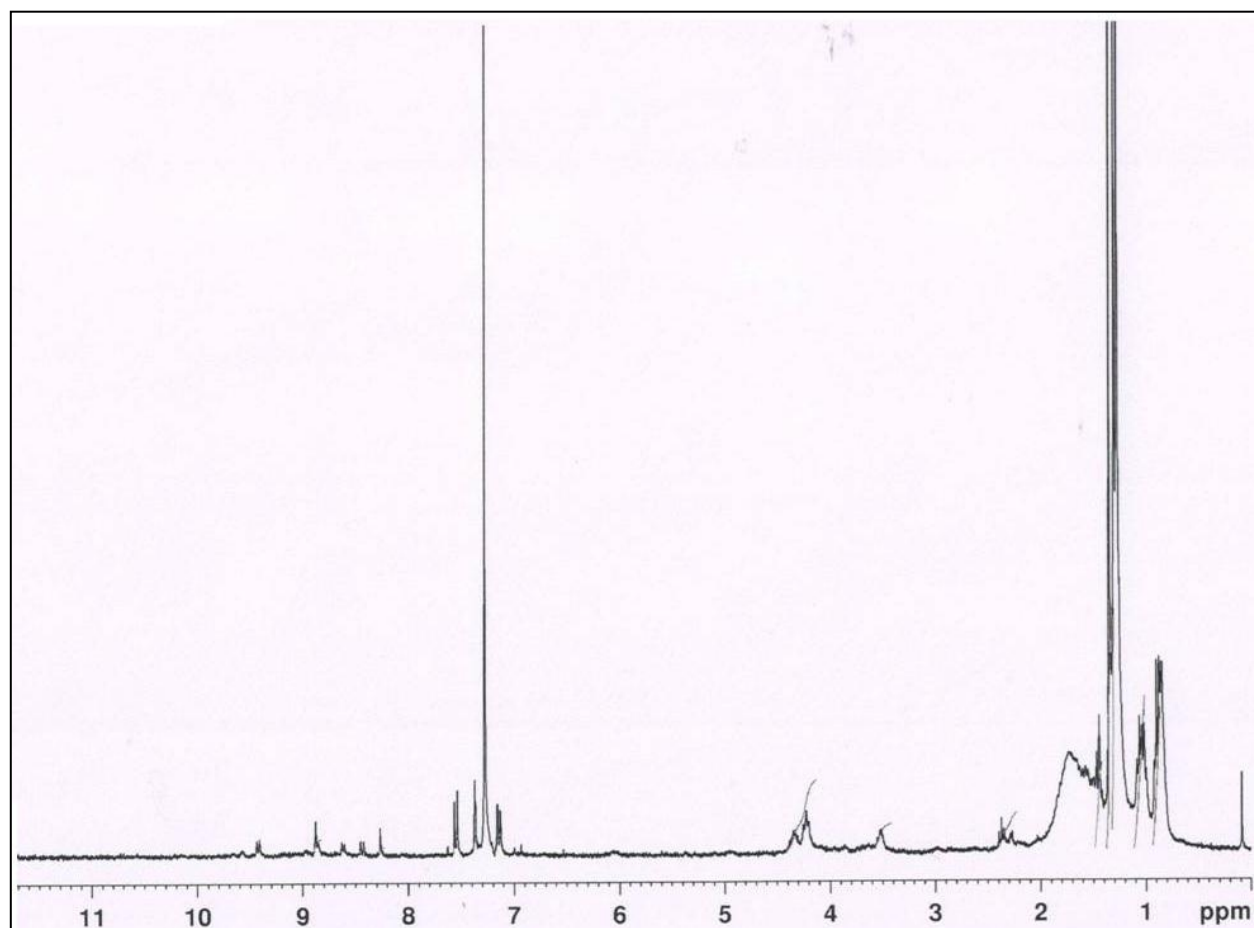

**Figure S4.** <sup>1</sup>H-NMR spectrum of compound **4** in CDCl<sub>3</sub> and TMS as internal standard.

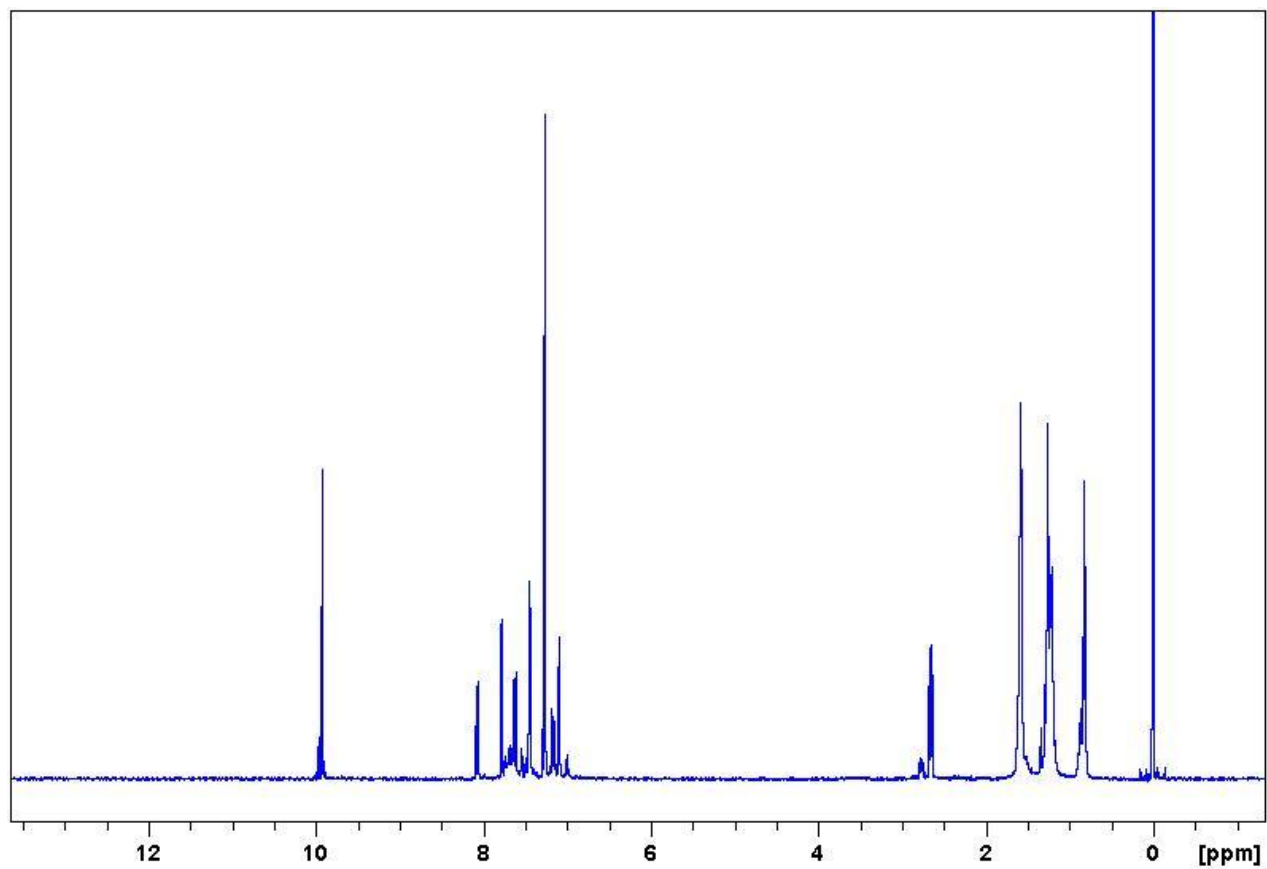

**Figure S5.** <sup>1</sup>H-NMR spectrum of compound **5** in CDCl<sub>3</sub> and TMS as internal standard.

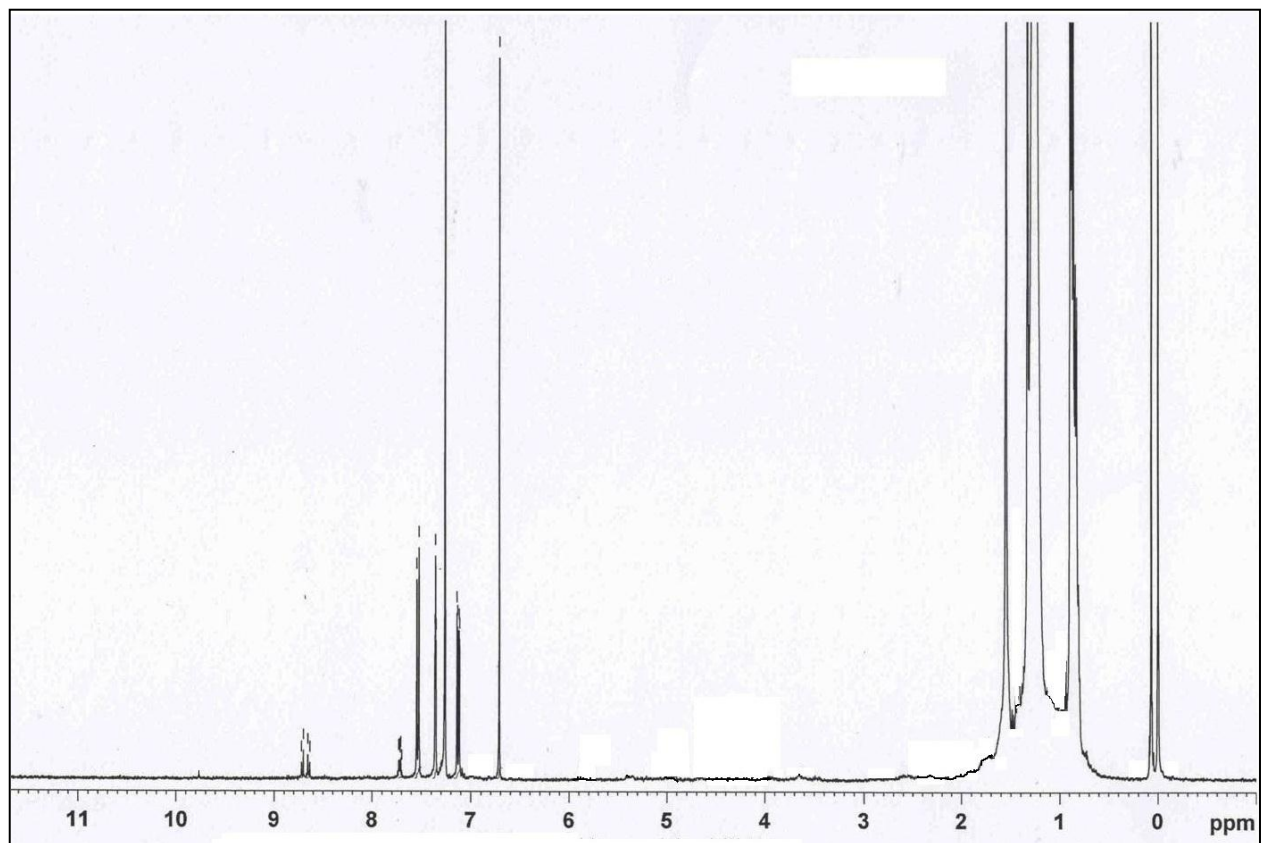

**Figure S6.** <sup>1</sup>H-NMR spectrum of compound **6** in CDCl<sub>3</sub> and TMS as internal standard.

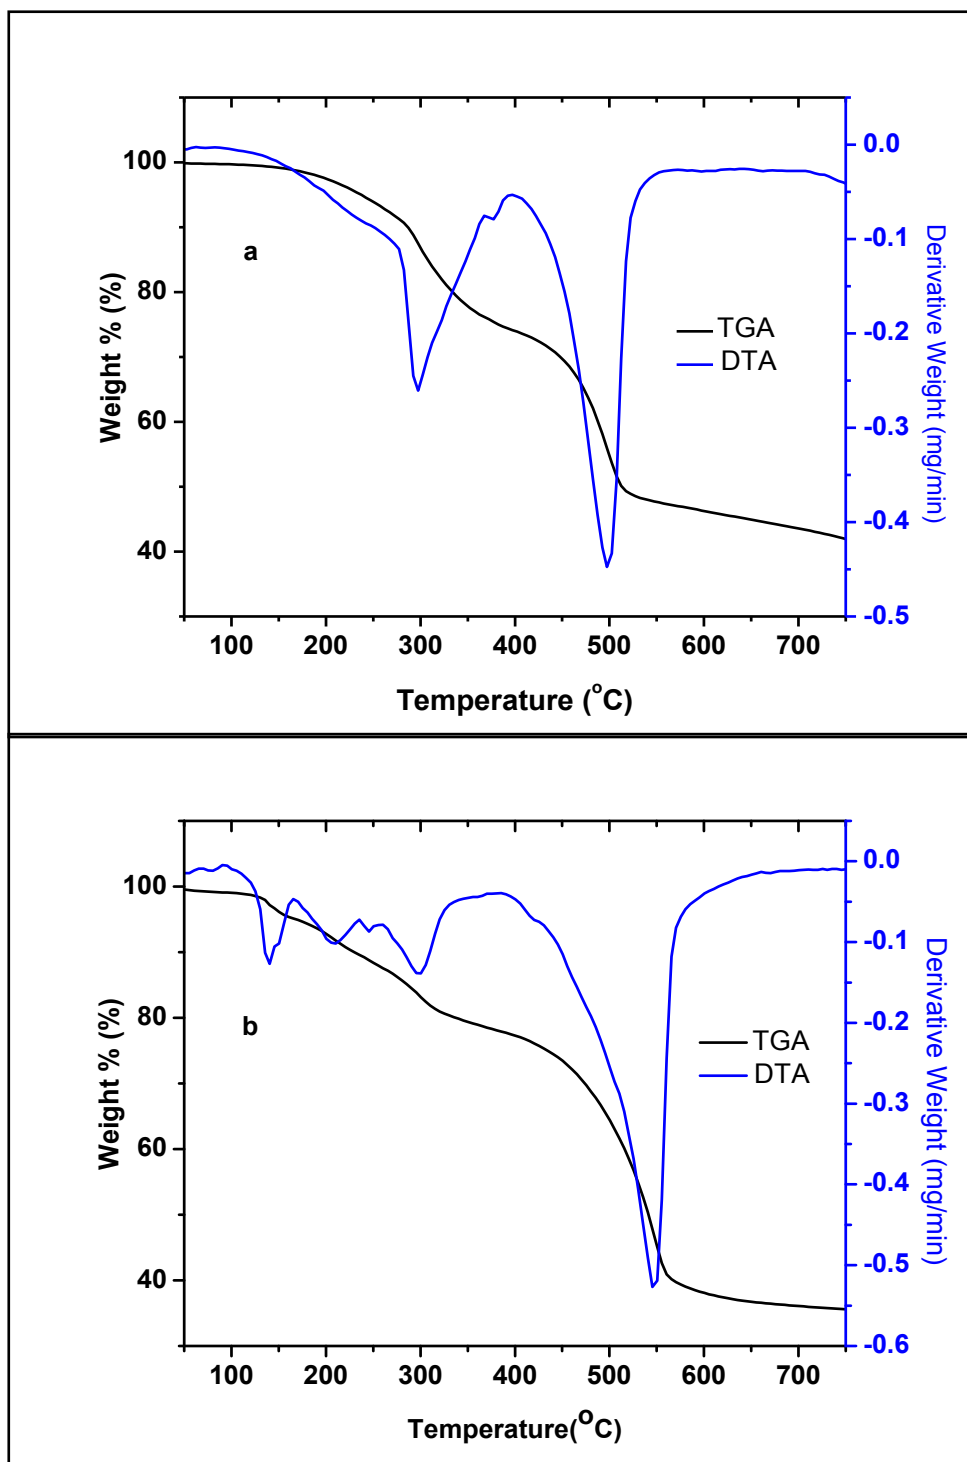

**Figure S7.** Thermogravimetric (black) and its corresponding derivative weight curves (blue) for (a) 1,7-DPPDI-PFDA and (b) 1,7-DBPDI-PFDA copolymer.



**Data:** XYZ coordinates of 1,7-DPPDI-PFDA copolymer optimized at RB3LYP/6-31G(d) basis set.

|   |              |             |             |
|---|--------------|-------------|-------------|
| H | -13.14836200 | -0.67904800 | -1.17697000 |
| C | -13.81133100 | -0.13091000 | -0.51624600 |
| C | -15.51504600 | 1.28160300  | 1.18158200  |
| C | -13.26160700 | 0.67555900  | 0.49713500  |
| C | -15.19185400 | -0.22575700 | -0.67390300 |
| C | -16.05149600 | 0.47830800  | 0.17149700  |
| C | -14.13699400 | 1.38035000  | 1.34493400  |
| H | -15.59777500 | -0.85343000 | -1.46288500 |
| H | -17.12799500 | 0.40251600  | 0.04601900  |
| H | -13.73423200 | 2.00598100  | 2.13637100  |
| H | -16.17400100 | 1.83346100  | 1.84667900  |
| C | -11.82094500 | 0.78464800  | 0.66929300  |
| C | -11.01637500 | 1.50968600  | 1.51626800  |
| C | -9.66948500  | 1.19107700  | 1.19304600  |
| C | -9.72412200  | 0.28491900  | 0.16192600  |
| O | -11.02826300 | 0.03192000  | -0.16310400 |
| H | -11.34851200 | 2.19653500  | 2.28175800  |
| H | -8.77121900  | 1.57537700  | 1.65383500  |
| C | -8.72341300  | -0.40642400 | -0.59485000 |
| O | -7.41876500  | -0.14651500 | -0.27856200 |
| C | -6.62819600  | -0.89951600 | -1.11287400 |
| C | -7.43475400  | -1.63249600 | -1.95126600 |
| C | -8.78056100  | -1.31799300 | -1.62132500 |
| H | -7.10415700  | -2.32080700 | -2.71606500 |
| H | -9.67997300  | -1.70802300 | -2.07496700 |
| C | -5.18781700  | -0.77868600 | -0.95675600 |
| C | -2.40265900  | -0.54862400 | -0.67412200 |
| C | -4.31598300  | -1.48625500 | -1.80531800 |
| C | -4.63098600  | 0.04528300  | 0.03783100  |
| C | -3.25202100  | 0.15611200  | 0.17819200  |
| C | -2.93914100  | -1.37027300 | -1.66724900 |
| H | -4.71855200  | -2.12843400 | -2.58276600 |
| H | -5.28658500  | 0.59893800  | 0.70065800  |
| H | -2.83185800  | 0.79797100  | 0.94537900  |
| H | -2.27585400  | -1.92004000 | -2.32672400 |
| N | -0.97060500  | -0.42586000 | -0.53797200 |
| C | 1.08149800   | 0.92242000  | -0.71351400 |

|   |             |             |             |
|---|-------------|-------------|-------------|
| C | 1.21930100  | -1.41738500 | -0.01517300 |
| C | 1.85377200  | -0.19134200 | -0.30780300 |
| C | -0.25268800 | -1.56455500 | -0.11454300 |
| C | -0.38746800 | 0.82745300  | -0.84650100 |
| O | -0.82851400 | -2.60989600 | 0.14901300  |
| O | -1.08124600 | 1.76726800  | -1.20402400 |
| C | 1.96617700  | -2.49561600 | 0.41536600  |
| H | 1.42125400  | -3.38657900 | 0.69842600  |
| C | 3.37639500  | -2.45856700 | 0.48396600  |
| C | 4.05241100  | -1.27766400 | 0.06047700  |
| C | 3.27533000  | -0.10265500 | -0.20497100 |
| C | 1.71537400  | 2.11845700  | -1.00907200 |
| H | 1.11841600  | 2.95476900  | -1.35718800 |
| C | 3.09484100  | 2.24554600  | -0.83170300 |
| H | 3.56752200  | 3.19634500  | -1.04498200 |
| C | 3.89367900  | 1.17953200  | -0.39634200 |
| C | 5.49222700  | -1.18546500 | -0.23705200 |
| C | 6.10826600  | 0.10787300  | -0.34506600 |
| C | 5.34154300  | 1.31139300  | -0.21730400 |
| C | 6.27946200  | -2.31688300 | -0.49190300 |
| H | 5.81433700  | -3.29116000 | -0.43231900 |
| C | 7.63543100  | -2.22545100 | -0.81127500 |
| H | 8.21925800  | -3.11608600 | -1.01968900 |
| C | 8.26347800  | -0.99112900 | -0.84589900 |
| C | 7.51015400  | 0.18295700  | -0.60473400 |
| C | 6.02665600  | 2.55093800  | -0.05033800 |
| C | 7.41393400  | 2.59558500  | -0.34381200 |
| H | 7.96118600  | 3.52898400  | -0.31476500 |
| C | 8.13014200  | 1.45935200  | -0.64284500 |
| C | 9.71017300  | -0.91038400 | -1.14493200 |
| N | 10.23940000 | 0.38259000  | -1.16771700 |
| C | 9.57886900  | 1.58637000  | -0.93737700 |
| H | 11.23140700 | 0.45125200  | -1.37129200 |
| O | 10.42539600 | -1.87669100 | -1.36554000 |
| O | 10.18095200 | 2.65011000  | -0.97913900 |
| N | 4.07477400  | -3.59215300 | 0.95995800  |
| C | 5.88756800  | -4.50742400 | 2.40204600  |
| C | 4.33830000  | -6.04125200 | 1.15532300  |
| C | 5.19270000  | -5.87384500 | 2.41688000  |
| C | 3.35894500  | -4.87407900 | 0.98789500  |

|   |            |             |             |
|---|------------|-------------|-------------|
| C | 4.87970100 | -3.37622900 | 2.18233700  |
| H | 6.63743100 | -4.48063700 | 1.60122000  |
| H | 4.98684700 | -6.09262400 | 0.27081800  |
| H | 4.54809400 | -5.94676900 | 3.30509400  |
| H | 2.61934900 | -4.90469700 | 1.80969100  |
| H | 4.20557200 | -3.30595200 | 3.05566400  |
| H | 6.41854000 | -4.32903100 | 3.34522000  |
| H | 3.76716100 | -6.97692300 | 1.19223600  |
| H | 5.93003800 | -6.68158200 | 2.49448700  |
| H | 2.80961700 | -4.98420500 | 0.04856700  |
| H | 5.39920000 | -2.42082400 | 2.09629900  |
| N | 5.39416000 | 3.70465800  | 0.39903200  |
| C | 5.06065000 | 6.14027400  | 0.53045500  |
| C | 4.72071400 | 4.67265600  | 2.57872000  |
| C | 4.63527900 | 6.10718400  | 2.01633500  |
| C | 4.41534400 | 3.62758700  | 1.50060300  |
| C | 6.04137700 | 5.01162400  | 0.20351800  |
| H | 5.52540200 | 7.09939000  | 0.27751900  |
| H | 5.72321800 | 4.48086800  | 2.98119800  |
| H | 3.61336400 | 6.49161500  | 2.11244800  |
| H | 3.39050800 | 3.76665100  | 1.12697600  |
| H | 6.36586200 | 5.08247500  | -0.83965300 |
| H | 4.18348600 | 6.03667100  | -0.11987900 |
| H | 4.01922500 | 4.53809800  | 3.40991900  |
| H | 5.27454900 | 6.77028000  | 2.61055800  |
| H | 4.45687600 | 2.61966400  | 1.92308000  |
| H | 6.94227400 | 5.11746900  | 0.83044400  |

**Data:** XYZ coordinates of 1,7-DBPDI-PFDA copolymer optimized at RB3LYP/6-31G(d) basis set.

|   |             |             |             |
|---|-------------|-------------|-------------|
| H | 13.60435500 | -2.29593200 | -1.07246200 |
| C | 14.23129600 | -2.15616800 | -0.19841700 |
| C | 15.84229200 | -1.79661700 | 2.05015400  |
| C | 13.64450100 | -1.74033600 | 1.01083600  |
| C | 15.60252500 | -2.38721600 | -0.27649500 |
| C | 16.41581500 | -2.20965700 | 0.84441600  |
| C | 14.47331300 | -1.56391500 | 2.13501100  |
| H | 16.03759200 | -2.70808500 | -1.21935300 |
| H | 17.48514800 | -2.39067300 | 0.78053200  |
| H | 14.04170700 | -1.24198800 | 3.07843900  |
| H | 16.46508900 | -1.65448500 | 2.92937000  |
| C | 12.21313100 | -1.49615200 | 1.10436400  |
| C | 11.37905000 | -1.10982600 | 2.12687900  |
| C | 10.06330200 | -1.04169600 | 1.59398800  |
| C | 10.16491500 | -1.39157500 | 0.26938400  |
| O | 11.46845700 | -1.66968700 | -0.03710000 |
| H | 11.67142800 | -0.89882900 | 3.14568700  |
| H | 9.15442200  | -0.77150600 | 2.11150800  |
| C | 9.21058500  | -1.51140200 | -0.79224500 |
| O | 7.90809800  | -1.22807100 | -0.48772100 |
| C | 7.16432100  | -1.40108700 | -1.63002900 |
| C | 7.99804400  | -1.79295600 | -2.65081600 |
| C | 9.31256900  | -1.86457800 | -2.11624000 |
| H | 7.70576600  | -2.00623200 | -3.66917200 |
| H | 10.22101000 | -2.13936900 | -2.63204700 |
| C | 5.73543100  | -1.14900300 | -1.53977100 |
| C | 2.97455200  | -0.66001700 | -1.38093100 |
| C | 4.90842300  | -1.30998200 | -2.66721700 |
| C | 5.14564100  | -0.73845500 | -0.33060600 |
| C | 3.77812800  | -0.49974000 | -0.25264200 |
| C | 3.54364500  | -1.06532900 | -2.58957000 |
| H | 5.33644600  | -1.62822900 | -3.61290300 |
| H | 5.76646700  | -0.60813000 | 0.54869500  |
| H | 3.33308100  | -0.18021400 | 0.68378500  |
| H | 2.91494700  | -1.19526000 | -3.46402500 |
| N | 1.55490200  | -0.40615800 | -1.30126300 |
| C | -0.77130100 | -1.21958000 | -1.36829400 |
| C | -0.32802400 | 1.15235500  | -1.00868400 |
| C | -1.25283600 | 0.09279800  | -1.15387800 |
| C | 1.13716000  | 0.92059200  | -1.07229700 |
| C | 0.67956200  | -1.50567400 | -1.46045300 |
| O | 1.94703800  | 1.82387000  | -0.93454400 |
| O | 1.11603000  | -2.62719800 | -1.66448000 |

|   |              |             |             |
|---|--------------|-------------|-------------|
| C | -0.77896700  | 2.43711700  | -0.80106700 |
| H | -0.05517100  | 3.23384600  | -0.67810000 |
| C | -2.15363100  | 2.71919200  | -0.77925200 |
| C | -3.12377000  | 1.71270300  | -0.98004400 |
| C | -2.65656200  | 0.36027700  | -1.09081300 |
| C | -1.67290600  | -2.25737100 | -1.51361300 |
| H | -1.29646600  | -3.25576600 | -1.70842700 |
| C | -3.04535300  | -2.02602900 | -1.38684800 |
| H | -3.71446800  | -2.86447200 | -1.48641000 |
| C | -3.56821300  | -0.74967200 | -1.13604000 |
| C | -4.56759200  | 1.96376800  | -1.08691600 |
| C | -5.47637300  | 0.85299400  | -0.99065000 |
| C | -5.00131200  | -0.50102100 | -0.92654200 |
| C | -5.10154100  | 3.24423900  | -1.28677800 |
| H | -4.43766200  | 4.08173700  | -1.42268500 |
| C | -6.47850100  | 3.47982700  | -1.31328800 |
| H | -6.86540000  | 4.48152400  | -1.46828000 |
| C | -7.36990000  | 2.44288300  | -1.11737700 |
| C | -6.88184800  | 1.12119600  | -0.95293900 |
| C | -5.95211600  | -1.51269000 | -0.66837400 |
| C | -7.32543600  | -1.23396100 | -0.59472200 |
| H | -8.03849400  | -2.03350900 | -0.43146600 |
| C | -7.79130500  | 0.05108900  | -0.75688100 |
| C | -8.82354200  | 2.72546700  | -1.09847000 |
| N | -9.64175100  | 1.61309200  | -0.89539400 |
| C | -9.25584500  | 0.28815700  | -0.71716800 |
| H | -10.64046800 | 1.79338100  | -0.87664700 |
| O | -9.31082700  | 3.83617600  | -1.24589800 |
| O | -10.08653100 | -0.59093500 | -0.54179900 |
| O | -2.56148700  | 4.01998700  | -0.61344100 |
| C | -1.78327300  | 4.91693600  | 0.11585500  |
| C | -0.36582900  | 6.86135400  | 1.58151400  |
| C | -1.41719200  | 6.11028800  | -0.49354700 |
| C | -1.45939500  | 4.67483200  | 1.45148800  |
| C | -0.75515500  | 5.64107200  | 2.16344800  |
| C | -0.71709600  | 7.07051400  | 0.24130100  |
| H | -1.68154400  | 6.28370000  | -1.53210200 |
| H | -1.76131500  | 3.74536800  | 1.92436500  |
| H | -0.51125200  | 5.43625700  | 3.20170600  |
| H | -0.44387400  | 7.99305800  | -0.25756600 |
| C | 0.40795900   | 7.89803700  | 2.41612000  |
| C | -0.45025300  | 8.32381000  | 3.63121500  |
| H | -0.69629400  | 7.47357800  | 4.27615600  |
| H | -1.39206400  | 8.78022700  | 3.30606100  |
| H | 0.09094900   | 9.05762500  | 4.24064400  |
| C | 0.75188700   | 9.16161000  | 1.60504200  |

|   |              |             |             |
|---|--------------|-------------|-------------|
| H | -0.14744200  | 9.67478100  | 1.24575700  |
| H | 1.38565300   | 8.93264500  | 0.74068100  |
| H | 1.30154600   | 9.86665400  | 2.23828800  |
| C | 1.73162700   | 7.27241100  | 2.91690300  |
| H | 1.55684500   | 6.39038900  | 3.54201700  |
| H | 2.29200000   | 7.99919400  | 3.51743000  |
| H | 2.36418900   | 6.96551300  | 2.07639200  |
| O | -5.52980500  | -2.81325000 | -0.54197400 |
| C | -6.25528200  | -3.72097900 | 0.22697900  |
| C | -7.57109600  | -5.68617900 | 1.75880500  |
| C | -6.51600300  | -3.48431600 | 1.57742900  |
| C | -6.63330600  | -4.91969400 | -0.36450800 |
| C | -7.28206100  | -5.89027500 | 0.40300300  |
| C | -7.17142500  | -4.46045900 | 2.32192600  |
| H | -6.20526500  | -2.55079100 | 2.03632000  |
| H | -6.41807900  | -5.08888700 | -1.41503900 |
| H | -7.56539200  | -6.81689200 | -0.08262300 |
| H | -7.36820200  | -4.25859400 | 3.37080100  |
| C | -8.29163300  | -6.73270300 | 2.62809700  |
| C | -7.37967500  | -7.13671100 | 3.81100500  |
| H | -7.88237400  | -7.87971300 | 4.44179400  |
| H | -7.12759000  | -6.27994900 | 4.44484000  |
| H | -6.44145200  | -7.57464000 | 3.45190600  |
| C | -9.60601100  | -6.12778800 | 3.17652300  |
| H | -10.12826200 | -6.85927700 | 3.80501700  |
| H | -10.27730800 | -5.84037500 | 2.35943000  |
| H | -9.42285300  | -5.23674700 | 3.78620100  |
| C | -8.64334400  | -8.00643800 | 1.83659300  |
| H | -9.15306100  | -8.71925900 | 2.49403400  |
| H | -7.74931000  | -8.50323700 | 1.44264800  |
| H | -9.31603100  | -7.79373300 | 0.99791600  |
